# Supplementary material
Source: PubMed Central journal article supplement (PMC7233797)

Supplement Figure 1.

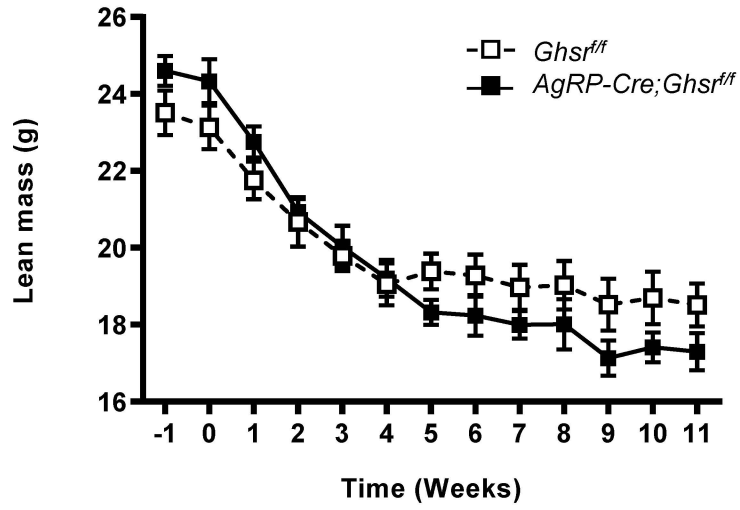

Supplement Figure 2.

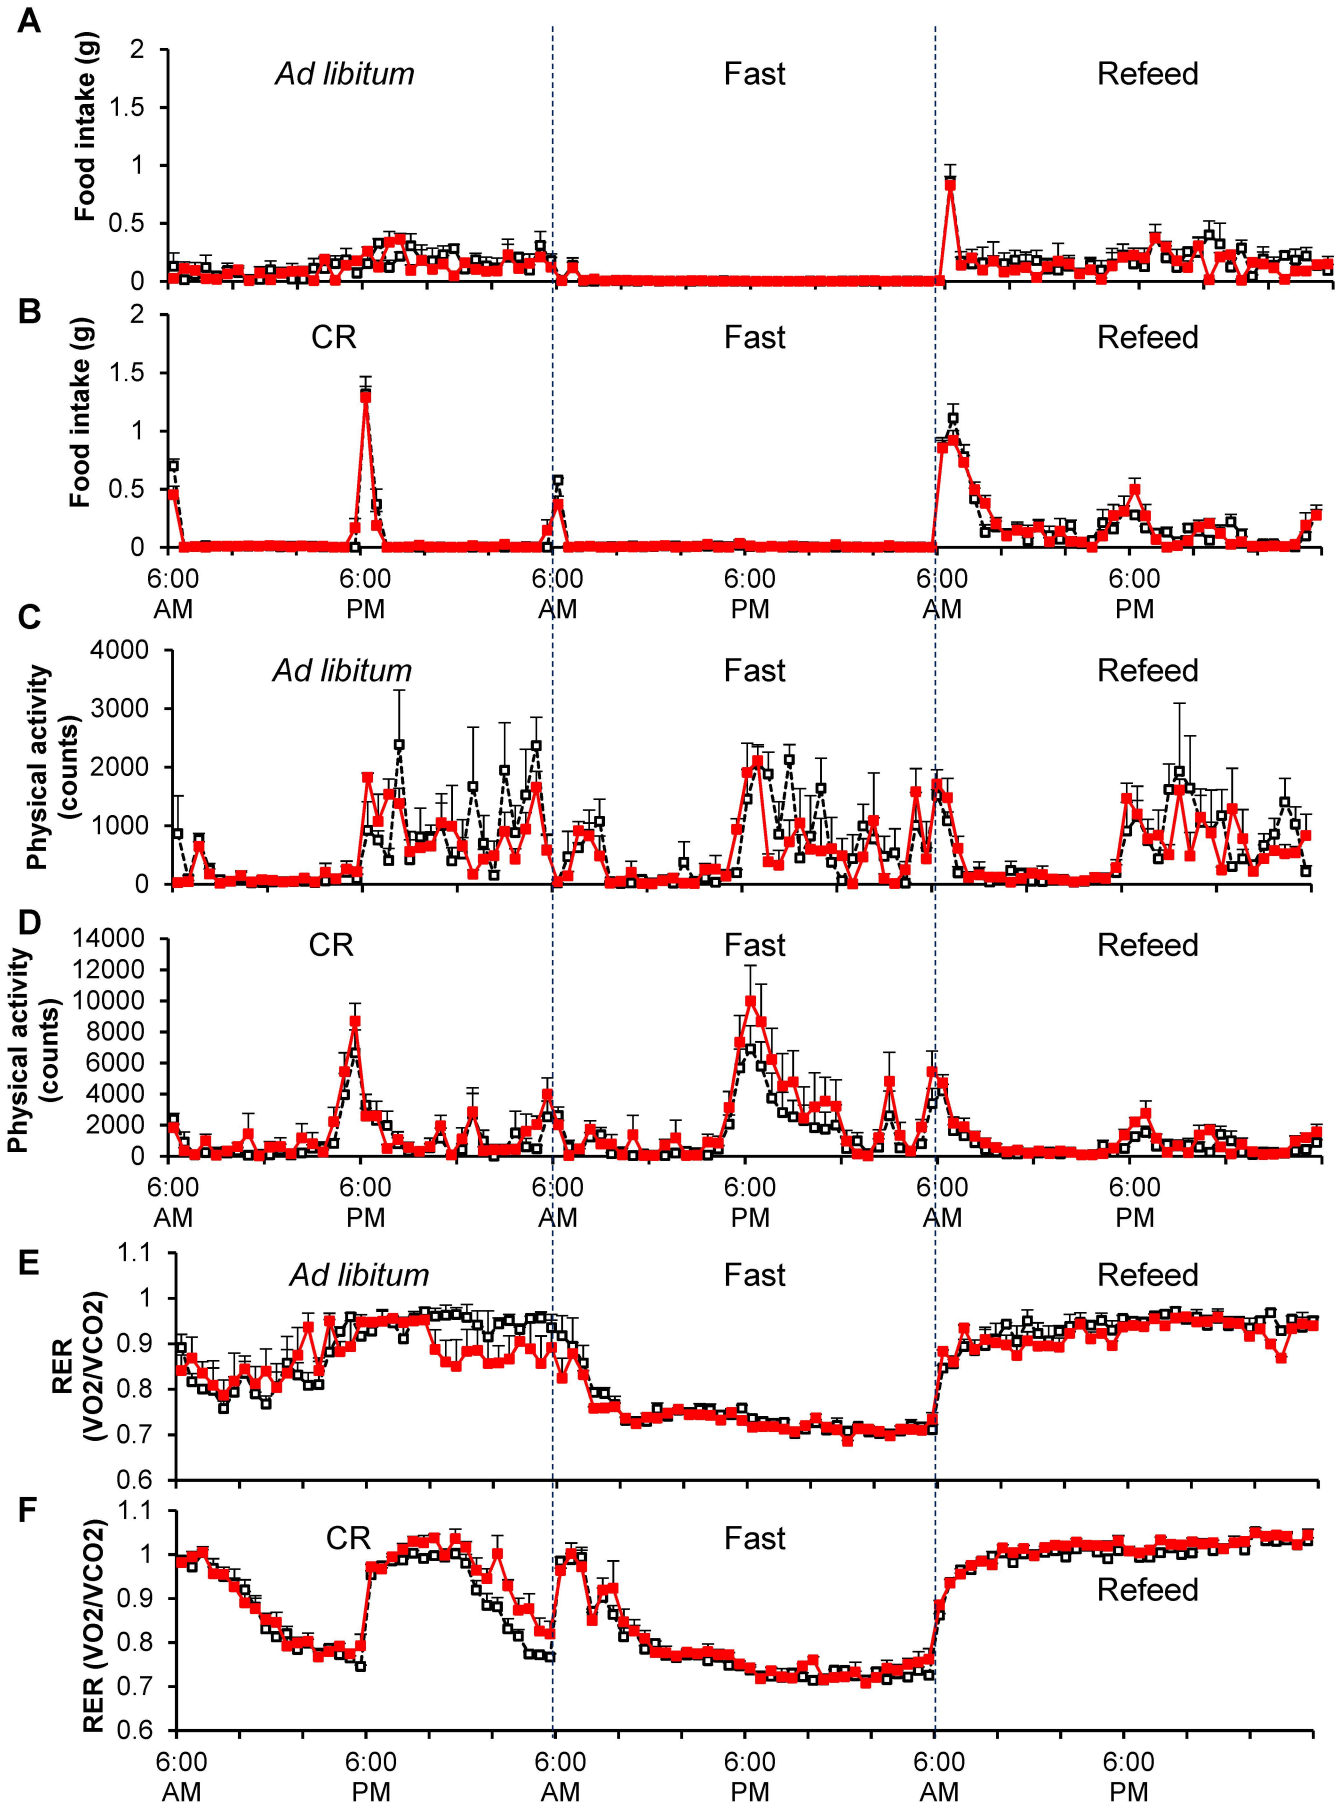

Supplement: NIHMS1038984-supplement-Supp_figS1-2.pdf [file NIHMS1038984-supplement-Supp_figS1-2.pdf]
